# Supplementary material for: Transcriptome Analysis and Discovery of Genes Involved in Immune Pathways from Coelomocytes of Sea Cucumber (Apostichopus japonicus) after Vibrio splendidus Challenge
Source: PubMed Central journal article supplement (PMC4519954; doi:10.3390/ijms160716347), 2015-07-17
Supplement: ijms-16-16347-s001.pdf [file ijms-16-16347-s001.pdf]

## Supplementary Information

**Table S1.** Genes and specific primers used for real-time PCR.

| NO. | Accession          | Gene Name |    | Primer Sequence                  | Tm (°C) | Product Length (bp) |
|-----|--------------------|-----------|----|----------------------------------|---------|---------------------|
| -   | -                  | β-actin   | -F | 5'-AGGTTATGCTCTTCCTCACGCTAT-3'   | 57.7    | -                   |
|     |                    |           | -R | 5'-TCGCTCGTTGCCGATGGT-3'         | 59.6    |                     |
| A1  | comp76725_c0_seq6  | FOXO1     | -F | 5'-GAGGCAGGGCGAAGAAAA-3'         | 61.41   | 110                 |
|     |                    |           | -R | 5'-CCCCAAAGAAAACGGAAGTG-3'       | 61.74   |                     |
| A2  | comp78415_c0_seq14 | ADCY2     | -F | 5'-AGCTGCGTGGAGAAGATCAAA-3'      | 62.35   | 122                 |
|     |                    |           | -R | 5'-GCAAACCTCCGTC AATACACCAA-3'   | 62.16   |                     |
| A3  | comp79708_c0_seq1  | STAT5B    | -F | 5'-AGAAACCAGATTTTCAGCGTCAG-3'    | 61.97   | 109                 |
|     |                    |           | -R | 5'-CCTTGGCTTGGCTCTCACTT-3'       | 61.84   |                     |
| A4  | comp74062_c0_seq5  | NEU1      | -F | 5'-GGAGTTACGACGGAGGTCAAA-3'      | 61.41   | 142                 |
|     |                    |           | -R | 5'-ACTCTCTTGCTGGTGCTTGCT-3'      | 61.67   |                     |
| A5  | com78701_c0_seq2   | AP-1      | -F | 5'-CACGGTCGGCTACGCTAAGT-3'       | 62.62   | 137                 |
|     |                    |           | -R | 5'-TCCCTTCTTGTTCCCTCTGCTTC-3'    | 62.1    |                     |
| A6  | comp76401_c0_seq2  | VPS37     | -F | 5'-GCCTGTCGGCTTTTAATTTGTC-3'     | 62.11   | 97                  |
|     |                    |           | -R | 5'-TTTTCTCTGGCGTCTTGTCTC-3'      | 62.07   |                     |
| A7  | comp76122_c1_seq21 | NCK2      | -F | 5'-CCACAGATCGTTGAGCTTCATT-3'     | 61.56   | 126                 |
|     |                    |           | -R | 5'-TCTCGGTTTTTCATCCTCATAGTTTC-3' | 61.91   |                     |
| A9  | comp77146_c0_seq3  | MAP3K4    | -F | 5'-CCCCATTTTCCTGTTTCTTATCC-3'    | 61.97   | 82                  |
|     |                    |           | -R | 5'-GGTCGGCTTGCTCTAATCT-3'        | 60.78   |                     |
| A12 | comp72396_c0_seq2  | DDX47     | -F | 5'-ACTTTGACATACCGACGCACTC-3'     | 61.48   | 275                 |
|     |                    |           | -R | 5'-ACTTCCACCTCTGCCTTCTTCT-3'     | 61.94   |                     |
| A13 | comp72841_c2_seq2  | Trmt1     | -F | 5'-GGTTATCAAGTTTCAGGCACTCAC-3'   | 61.25   | 119                 |
|     |                    |           | -R | 5'-TTTTCTCTCTTCACAGGTTTTCC-3'    | 62.07   |                     |
| A14 | comp73256_c0_seq3  | Hrsp12    | -F | 5'-ATGGTAGAGGGCGGTATTGAG-3'      | 60.35   | 179                 |
|     |                    |           | -R | 5'-GGGAACTTGTCCGTGAAATAGG-3'     | 61.92   |                     |
| A15 | comp74533_c0_seq6  | CNOT10    | -F | 5'-TGGTCATTTATATGCAGCAGAGG-3'    | 61.34   | 116                 |
|     |                    |           | -R | 5'-CAGGAGAGGCAGGGTAGATAACA-3'    | 61.83   |                     |

Table S1. *Cont.*

| NO. | Accession          | Gene Name |    | Primer Sequence                    | Tm (°C) | Product Length (bp) |
|-----|--------------------|-----------|----|------------------------------------|---------|---------------------|
| A17 | comp74908_c0_seq5  | ehhadh    | -F | 5'-GGTTTGCTATGGGTGCCTTC-3'         | 61.76   | 96                  |
|     |                    |           | -R | 5'-GCCCCCTCCCTCGTGATAAA-3'         | 62.27   |                     |
| A18 | comp75055_c2_seq2  | DHX35     | -F | 5'-TGCAAAGAAGTGACCTTGGAAC-3'       | 61.56   | 140                 |
|     |                    |           | -R | 5'-GGCACCCAGAGCATAGAGGA-3'         | 62.65   |                     |
| A20 | comp76071_c1_seq12 | Map2k6    | -F | 5'-TAACGCAGATGTCCATCACAAGA-3'      | 62.84   | 138                 |
|     |                    |           | -R | 5'-GCCTCCGTCAGCAAATCAC-3'          | 61.79   |                     |
| A21 | comp76305_c0_seq6  | Gvin1     | -F | 5'-CTAACTGTCGTTGGTGCTGTATTTT-3'    | 60.80   | 87                  |
|     |                    |           | -R | 5'-CTGTTTCCCTTGGTTGATGTAGTT-3'     | 60.65   |                     |
| A23 | comp76725_c0_seq4  | PRPFF19   | -F | 5'-GCAGAGCGTAAGAAACGAGGA-3'        | 61.93   | 92                  |
|     |                    |           | -R | 5'-CCTGGATGAGAGGCTTTAGGTTT-3'      | 62.07   |                     |
| A24 | comp77143_c0_seq19 | Mapkap1   | -F | 5'-ATCGGGAACCAGCATCAAAA-3'         | 62.66   | 222                 |
|     |                    |           | -R | 5'-TCGTCCACTTCACCCTCCTC-3'         | 62.60   |                     |
| A25 | comp77913_c0_seq1  | V1g163483 | -F | 5'-AACACCAGGTACAATCGTGGAA-3'       | 61.56   | 101                 |
|     |                    |           | -R | 5'-TGGGCATCTCGGCAAAC-3'            | 61.82   |                     |
| A27 | comp78900_c0_seq70 | ND5       | -F | 5'-TCTACTCGAACGGATGCGAAA-3'        | 63.04   | 228                 |
|     |                    |           | -R | 5'-CCACGGATGAAGCCCAAA-3'           | 62.99   |                     |
| A29 | comp80082_c0_seq9  | Usp39     | -F | 5'-AATGGTACGAGATAACAAGACCTTCA-3'   | 60.29   | 135                 |
|     |                    |           | -R | 5'-CTGTGCTGTACCTGCGTTAG-3'         | 62.01   |                     |
| A30 | comp80196_c0_seq6  | Hsp70Ab   | -F | 5'-GGGAATGGGATGGCGTTAG-3'          | 62.51   | 138                 |
|     |                    |           | -R | 5'-CGATCCTGATGATAGTGA CT TGT TG-3' | 62.09   |                     |
| S1  | comp79328_c1_seq13 | NFKB      | -F | 5'-TGGAGTTGCCTTCCCACA-3'           | 61.26   | 133                 |
|     |                    |           | -R | 5'-GAAAAGCACCCGCCACA-3'            | 61.84   |                     |
| S2  | comp74502_c1_s     | ADCY2     | -F | 5'-AAAAGTTTTCCAGACTTCCAGATCC-3'    | 62.21   | 83                  |
|     |                    |           | -R | 5'-GCCACGAGAATACACAGCA-3'          | 62.21   |                     |

Table S1. Cont.

| NO. | Accession          | Gene Name |    | Primer Sequence                 | Tm (°C) | Product Length (bp) |
|-----|--------------------|-----------|----|---------------------------------|---------|---------------------|
| S3  | comp78293_c0_seq2  | ABCA2     | -F | 5'-ACCAGGAAGCTGGGAAAACA-3'      | 61.94   | 83                  |
|     |                    |           | -R | 5'-ACCCCTAAAAGACCAAAGCACTC-3'   | 61.99   |                     |
| S4  | comp78293_c0_seq4  | ABCA2     | -F | 5'-GAGTCCTGAACAACGAAACAGAAA-3'  | 61.86   | 149                 |
|     |                    |           | -R | 5'-CACCCCTAAAAGACCAAAGCAC-3'    | 62.06   |                     |
| S5  | comp79570_c0_seq6  | SGSH      | -F | 5'-TGAGGAGATGAAGAAGTCCCTGT-3'   | 61.52   | 102                 |
|     |                    |           | -R | 5'-AAATCAGCACACCCATCCAA-3'      | 61.31   |                     |
| S6  | comp77223_c0_seq3  | ABCA2     | -F | 5'-TATGACCGCTGCTCTGATGG-3'      | 62.31   | 148                 |
|     |                    |           | -R | 5'-TCCAGGCTTTGCTCTGTGG-3'       | 62.52   |                     |
| S7  | comp80153_c0_seq15 | AP-3      | -F | 5'-CAGCGATCAGTTTGCACGA-3'       | 62.18   | 143                 |
|     |                    |           | -R | 5'-CCACTCTCTCCACCACTCCA-3'      | 61.29   |                     |
| S8  | comp78750_c3_seq11 | DNase II  | -F | 5'-GAAGATAGTCAGCAGCGTGGAA-3'    | 61.81   | 104                 |
|     |                    |           | -R | 5'-CTGTGGTTGATTTTGTGGTGAG-3'    | 61.7    |                     |
| S9  | comp77471_c1_seq34 | rabaptin5 | -F | 5'-AGATGGCAAACGATCAATTCCT-3'    | 62.04   | 141                 |
|     |                    |           | -R | 5'-TCTCTTGTTCCCTCTCGCTGTTG-3'   | 62      |                     |
| S11 | comp77877_c0_seq1  | CHMP5     | -F | 5'-AGACGTTGAAAGATACCAAAACCAC-3' | 61.75   | 145                 |
|     |                    |           | -R | 5'-ACCTCGTCCGTCATTCCA-3'        | 61.48   |                     |
| S12 | comp75233_c0_seq13 | PAR6      | -F | 5'-GTCAAACCAGCCAATCAGAGAAA-3'   | 62.7    | 190                 |
|     |                    |           | -R | 5'-GCCTGTCCCTCGTGTGTGTTG-3'     | 62.81   |                     |
| S13 | comp79698_c0_seq6  | EGFR/RTK  | -F | 5'-AACGGGGTTTGCAGATG-3'         | 62.02   | 160                 |
|     |                    |           | -R | 5'-TGGGAGGTCTGTGGATTGG-3'       | 61.93   |                     |
| S14 | comp80408_c0_seq17 | FLNA      | -F | 5'-ACATACCGTCAGTGTCAAGAACAAG-3' | 61.69   | 107                 |
|     |                    |           | -R | 5'-CACCTGCGTGAACCTTTGTGAG-3'    | 61.86   |                     |
| S15 | comp73644_c0_seq2  | ARHGAP39  | -F | 5'-ACGACGGAAAACCTTCTTTGAGG-3'   | 61.83   | 127                 |
|     |                    |           | -R | 5'-CGATGTGCTTGCGGATGT-3'        | 61.88   |                     |
